# Supplementary material
Source: PubMed Central journal article supplement (PMC3741051)
Supplement: NIHMS494432-supplement-Supp_Table_S1.pdf [file NIHMS494432-supplement-Supp_Table_S1.pdf]

**Table S1 Clinical information for patients with seizures captured during RES**

| Pt | Total # of szs | Sz type (# of szs)                    | MRI                                                                                              | PET Hypometabolism                           | Ictal SPECT Hyperperfusion | Scalp EEG onset <sup>a</sup> | Intracranial EEG Onset <sup>a</sup>  | Overall Localization       |
|----|----------------|---------------------------------------|--------------------------------------------------------------------------------------------------|----------------------------------------------|----------------------------|------------------------------|--------------------------------------|----------------------------|
| 1  | 5              | Aura (2)<br>Partial (2)<br>GTC (1)    | Normal                                                                                           | L T                                          | L T                        | Bi T                         | R > L mesialT                        | Bi T                       |
| 2  | 4              | Partial (4)                           | LT atrophy and polymicrogyria                                                                    | Normal                                       | L F                        | L > R H                      | Mostly R inf F-T, but some Bi or L T | Unlocalized                |
| 3  | 4              | Aura (2),<br>Partial (2)              | R HCA & L T gray matter abnormal                                                                 | L T                                          | LT & RO                    | L T & R T                    | N/A                                  | RO and LT                  |
| 4  | 2              | Partial (1),<br>GTC (1)               | Encephalomalacia, R T-P-O                                                                        | R P-O-T                                      | N/A                        | R H                          | R lat F, cingulate, medial O         | R H <sup>b</sup>           |
| 5  | 2              | Partial (2)                           | Previous L T resection                                                                           | R lat T                                      | R T                        | R > L T                      | R mes T, and R T-O                   | R T, O                     |
| 6  | 1              | Partial(1)                            | Previous L T resection                                                                           | Normal                                       | N/A                        | L T                          | L HC, L fusiform gyrus               | L HC, L fusiform gyrus     |
| 7  | 1              | GTC (1)                               | Normal                                                                                           | N/A                                          | N/A                        | L F                          | N/A                                  | LF                         |
| 8  | 1              | Partial (1)                           | Normal                                                                                           | N/A                                          | N/A                        | L T                          | N/A                                  | L T                        |
| 9  | 1              | Partial (1)                           | Increased T2 signal in bilateral HC and R P cortex                                               | N/A                                          | N/A                        | Bi T                         | N/A                                  | R P-T                      |
| 10 | 1              | GTC (1)                               | Normal                                                                                           | L T                                          | N/A                        | L H                          | L F                                  | LF <sup>c</sup>            |
| 11 | 2              | Partial (2)                           | R HC atrophy, R F, P infarct                                                                     | RT, and in area of R F, P infarct            | N/A                        | R T                          | N/A                                  | RT <sup>d</sup>            |
| 12 | 1              | GTC (1)                               | Normal                                                                                           | N/A                                          | N/A                        | R T                          | N/A                                  | R T                        |
| 13 | 12             | Subclinical (2), Aura (4) Partial (6) | R sup F gyrus thickening consistent with cortical dysplasia                                      | R F                                          | N/A                        | R F                          | R med F                              | R F <sup>e</sup>           |
| 14 | 2              | Partial (2)                           | L HC enlarged and increased T2 signal                                                            | L T                                          | N/A                        | L T                          | N/A                                  | L T                        |
| 15 | 6              | Partial (6)                           | R precentral gyrus increased T2                                                                  | Normal                                       | N/A                        | No EEG changes               | R F (primary motor cortex)           | R F (primary motor cortex) |
| 16 | 2              | Aura (2)                              | LF encephalomalacia and increased T2 signal consistent with previous oligodendroglioma resection | L F signal loss and mild R F hypermetabolism | N/A                        | No EEG changes               | N/A                                  | Unlocalized                |
| 17 | 7              | Aura (1),<br>Partial (6)              | L T heterotopia                                                                                  | N/A                                          | N/A                        | Bi F                         | N/A                                  | Unlocalized                |
| 18 | 5              | Partial (5)                           | Normal                                                                                           | mild R T                                     | N/A                        | L H                          | N/A                                  | L H                        |

<sup>a</sup>Based on overall EEG of all seizures, not just seizure occurring during RES. Abbreviations:

HCA=hippocampal atrophy, R=right, L=left, O=occipital, T=temporal, P=parietal, F=frontal, Sup=superior,

Lat=lateral, Inf=inferior, Ant=anterior, Post=posterior, Bi=bilateral, H=hemisphere, sGTC=secondarily

generalized tonic clonic sz=seizure, Pt=patient. <sup>b</sup> Had excision of right posterior temporo-parietal-occipital lobe;

no seizures or auras at 6 month follow-up. <sup>c</sup>Had left frontal pole resection; breakthrough sz's at 7 month follow-

up. <sup>d</sup> Had right antero-medial temporal lobe resection, no follow-up available. <sup>e</sup> Had right medial frontal lobe

resection; no seizures or auras at 2 month follow-up.
